# Supplementary material for: Simulating the binding of key organic functional groups to aqueous calcium carbonate species
Source: Royal Society of Chemistry journal article supplement (doi:10.1039/d1cp04226b), 2021-01-01
Supplement: d1cp04226b1.pdf [file d1cp04226b1.pdf]

Simulating the binding of organic functional groups to aqueous calcium carbonate species

## Supporting Information for Simulating the binding of organic functional groups to aqueous calcium carbonate species

Alicia Schuitemaker,<sup>1</sup> Julie Aufort,<sup>1</sup> Katarzyna B. Koziara,<sup>1</sup> Raffaella Demichelis,<sup>1</sup> Paolo Raiteri,<sup>1</sup> and Julian D. Gale<sup>1, a)</sup>

*Curtin Institute for Computation, The Institute for Geoscience Research (TIGeR), School of Molecular and Life Sciences, Curtin University, GPO Box U1987, 6845 Perth, Western Australia, Australia;*

(Dated: 26 October 2021)

### S1. SUPPLEMENTARY FIGURE

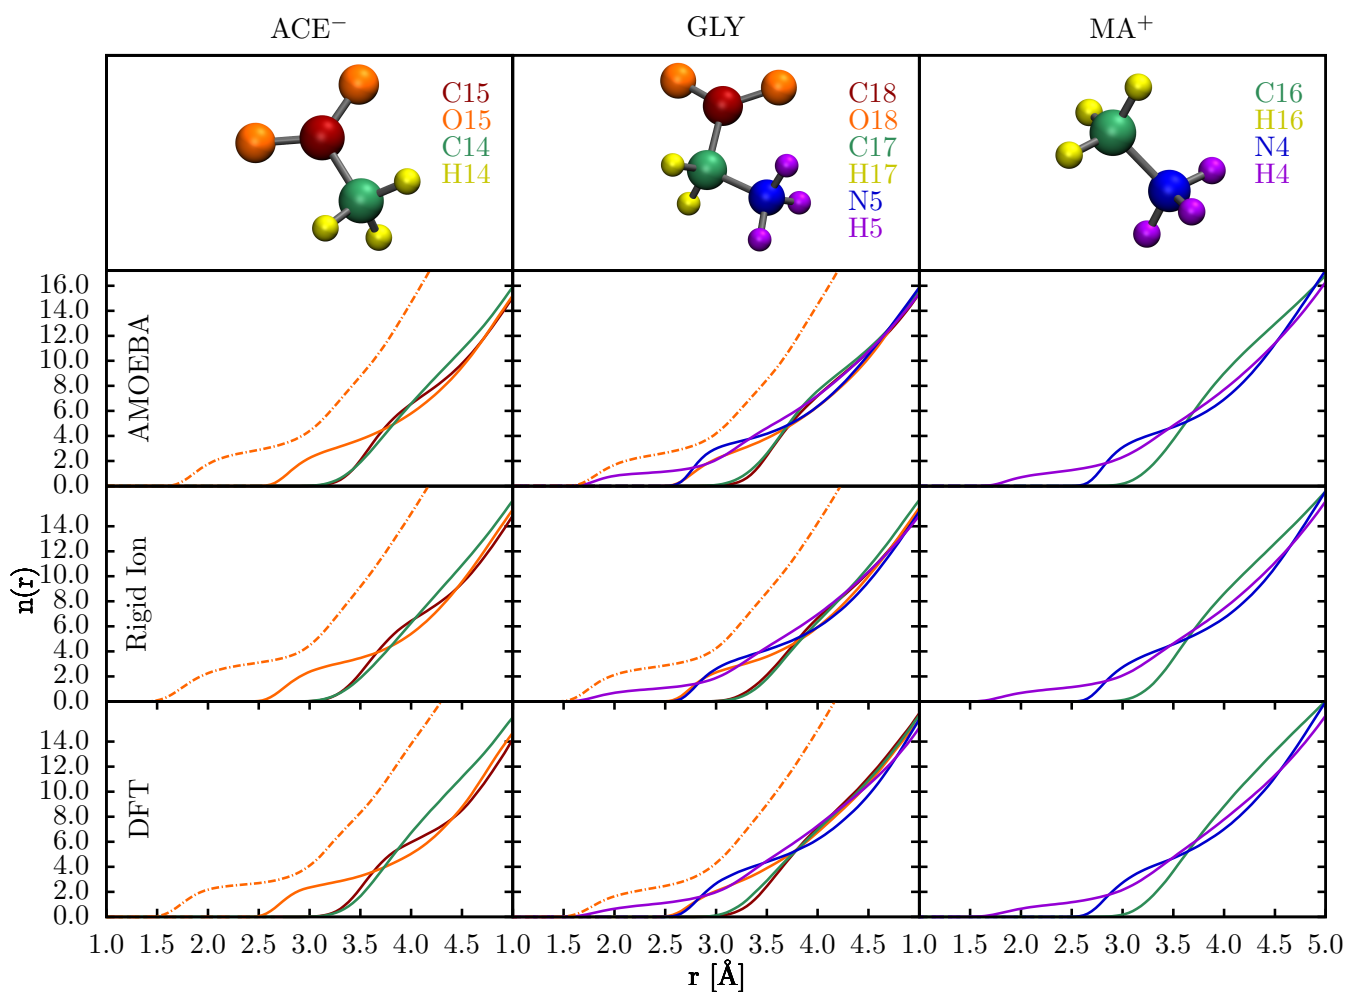

FIG. S1. Integrals of the radial distribution functions (coordination numbers,  $n(r)$ ) for acetate ( $\text{ACE}^-$ ), the glycine zwitterion ( $\text{GLY}$ ) and methylammonium ( $\text{MA}^+$ ) in water obtained from molecular dynamics simulation. The solid and dashed lines are for  $\text{O}_w$  and  $\text{H}_w$ , respectively, with curves colour-coded to reflect the atom of the molecule whose radial distribution function is being shown, as per the scheme given. For clarity, curves are only shown for those atoms where there are significant peaks observed.

<sup>a)</sup>Electronic mail: [j.gale@curtin.edu.au](mailto:j.gale@curtin.edu.au)

## S2. FORCE FIELD PARAMETERS FOR POLARISABLE AMOEBA MODEL

```

<ForceField>
<Info>
<DateGenerated>2021-08-23 14:18</DateGenerated>
</Info>

<AtomTypes>
<Type name="1" class="1" element="O" mass="15.999" /> <!-- "Water_O" -->
<Type name="2" class="2" element="H" mass="1.008" /> <!-- "Water_H" -->
<Type name="3" class="3" element="Ca" mass="40.078" /> <!-- "Calcium_Ion_Ca+2" -->
<Type name="11" class="11" element="C" mass="12.011" /> <!-- "Carbonate_C" -->
<Type name="12" class="12" element="O" mass="15.995" /> <!-- "Carbonate_O" -->
<Type name="21" class="21" element="C" mass="12.011" /> <!-- "Acetate_CH3" -->
<Type name="22" class="22" element="H" mass="1.008" /> <!-- "Acetate_H3C" -->
<Type name="23" class="23" element="C" mass="12.011" /> <!-- "Acetate_C=O" -->
<Type name="24" class="24" element="O" mass="15.999" /> <!-- "Acetate_O=C" -->
<Type name="25" class="25" element="N" mass="14.007" /> <!-- "MethylAmmonium_N+" -->
<Type name="26" class="26" element="H" mass="1.008" /> <!-- "MethylAmmonium_H4N+" -->
<Type name="27" class="27" element="C" mass="12.011" /> <!-- "MethylAmmonium_CH3" -->
<Type name="28" class="28" element="H" mass="1.008" /> <!-- "MethylAmmonium_H3C" -->
<Type name="29" class="29" element="N" mass="14.007" /> <!-- "MethylAmmonium_N+" -->
<Type name="30" class="30" element="H" mass="1.008" /> <!-- "MethylAmmonium_H4N+" -->
<Type name="31" class="31" element="C" mass="12.011" /> <!-- "Methylene_CH2" -->
<Type name="32" class="32" element="H" mass="1.008" /> <!-- "Methylene_H2C" -->
<Type name="33" class="33" element="C" mass="12.011" /> <!-- "Acetate_C=O" -->
<Type name="34" class="34" element="O" mass="15.999" /> <!-- "Acetate_O=C" -->
</AtomTypes>

<Residues>
<Residue name="HOH">
<Atom name="O" type="1" />
<Atom name="H1" type="2" />
<Atom name="H2" type="2" />
<Bond atomName1="H1" atomName2="O" />
<Bond atomName1="H2" atomName2="O" />
</Residue>
<Residue name="Ca">
<Atom name="Ca" type="3"/>
</Residue>
<Residue name="CO3">
<Atom name="C" type="11" />
<Atom name="O1" type="12" />
<Atom name="O2" type="12" />
<Atom name="O3" type="12" />
<Bond atomName1="O1" atomName2="C" />
<Bond atomName1="O2" atomName2="C" />
<Bond atomName1="O3" atomName2="C" />
</Residue>
<Residue name="ACE">
<Atom name="C1" type="21" />
<Atom name="H1" type="22" />
<Atom name="H2" type="22" />
<Atom name="H3" type="22" />
<Atom name="C2" type="23" />
<Atom name="O1" type="24" />
<Atom name="O2" type="24" />
<Bond atomName1="H1" atomName2="C1" />
<Bond atomName1="H2" atomName2="C1" />
<Bond atomName1="H3" atomName2="C1" />
<Bond atomName1="C2" atomName2="C1" />
<Bond atomName1="O1" atomName2="C2" />
<Bond atomName1="O2" atomName2="C2" />
</Residue>
<Residue name="MNH3">
<Atom name="N" type="25" />
<Atom name="H4" type="26" />
<Atom name="H5" type="26" />
<Atom name="H6" type="26" />
<Atom name="C" type="27" />
<Atom name="H1" type="28" />
<Atom name="H2" type="28" />
<Atom name="H3" type="28" />
<Bond atomName1="H1" atomName2="C" />
<Bond atomName1="H2" atomName2="C" />
<Bond atomName1="H3" atomName2="C" />
<Bond atomName1="N" atomName2="C" />
<Bond atomName1="H4" atomName2="N" />
<Bond atomName1="H5" atomName2="N" />
<Bond atomName1="H6" atomName2="N" />
</Residue>
<Residue name="GLY">
<Atom name="N" type="29" />
<Atom name="H1" type="30" />
<Atom name="H2" type="30" />
<Atom name="H3" type="30" />
<Atom name="O1" type="31" />
<Atom name="H4" type="32" />
<Atom name="H5" type="32" />
<Atom name="C2" type="33" />
<Atom name="O1" type="34" />
<Atom name="O2" type="34" />
<Bond atomName1="H1" atomName2="N" />
<Bond atomName1="H2" atomName2="N" />
<Bond atomName1="H3" atomName2="N" />
<Bond atomName1="N" atomName2="C1" />
<Bond atomName1="H4" atomName2="C1" />
<Bond atomName1="H5" atomName2="C1" />
<Bond atomName1="C1" atomName2="C2" />
<Bond atomName1="C2" atomName2="O1" />
<Bond atomName1="C2" atomName2="O2" />
</Residue>
</Residues>

<!-- Bond stretching parameters, units: nm and kj/mol/nm^2 | conversion factor: 418.4 -->
<AmoebaBondForce bond-cubic="-25.5" bond-quartic="379.3125">
<Bond class1="1" class2="2" length="0.09572" k="232986.04"/>
<Bond class1="11" class2="12" length="0.13100" k="211292.00"/>

```

```

<Bond class1="21" class2="22" length="0.11120" k="142674.40"/>
<Bond class1="21" class2="23" length="0.15090" k="144348.00"/>
<Bond class1="23" class2="24" length="0.12553" k="294972.00"/>
<Bond class1="25" class2="26" length="0.10150" k="193258.96"/>
<Bond class1="25" class2="27" length="0.14480" k="159535.92"/>
<Bond class1="27" class2="30" length="0.11120" k="142674.40"/>
<Bond class1="29" class2="30" length="0.10150" k="193258.96"/>
<Bond class1="29" class2="31" length="0.14480" k="159535.92"/>
<Bond class1="31" class2="32" length="0.11120" k="142674.40"/>
<Bond class1="31" class2="33" length="0.15090" k="144348.00"/>
<Bond class1="33" class2="34" length="0.12553" k="294972.00"/>
</AmoebaBondForce>

<!-- Angle bending parameters, units: kJ/mol/deg^2 and deg | conversion factor: 1.27452e-3 -->
<AmoebaAngleForce angle-cubic="0.014" angle-quartic="5.6e-05" angle-pentic="-7e-07" angle-sextic="2.2e-08">
<Angle class1="12" class2="11" class3="12" k="0.06206912" angle1="108.50" />
<Angle class1="12" class2="11" class3="11" k="0.15294240" angle1="120.00" />
<Angle class1="22" class2="21" class3="22" k="0.05098080" angle1="107.80" />
<Angle class1="22" class2="21" class3="23" k="0.04970628" angle1="109.50" />
<Angle class1="21" class2="23" class3="24" k="0.10196160" angle1="122.40" />
<Angle class1="24" class2="23" class3="24" k="0.07341235" angle1="134.00" />
<Angle class1="27" class2="25" class3="26" k="0.05505926" angle1="108.50" />
<Angle class1="26" class2="25" class3="26" k="0.05505926" angle1="105.40" />
<Angle class1="28" class2="27" class3="28" k="0.05098080" angle1="107.80" />
<Angle class1="25" class2="27" class3="28" k="0.07519668" angle1="109.30" />
<Angle class1="30" class2="29" class3="30" k="0.05505926" angle1="105.40" />
<Angle class1="30" class2="29" class3="31" k="0.05505926" angle1="108.50" />
<Angle class1="32" class2="31" class3="32" k="0.05098080" angle1="107.80" />
<Angle class1="29" class2="31" class3="32" k="0.07519668" angle1="109.30" />
<Angle class1="33" class2="31" class3="29" k="0.07150057" angle1="109.50" />
<Angle class1="32" class2="31" class3="33" k="0.04970628" angle1="109.50" />
<Angle class1="31" class2="33" class3="34" k="0.10196160" angle1="122.40" />
<Angle class1="34" class2="33" class3="34" k="0.07341235" angle1="134.00" />
</AmoebaAngleForce>

<!-- Out of plane bending parameters, units: kJ/mol/deg^2 | conversion factor: 1.27452e-3 -->
<AmoebaOutOfPlaneBendForce type="ALLINGER" opbend-cubic="0.014" opbend-quartic="5.6e-05" opbend-pentic="-7e-07" opbend-sextic="2.2e-08">
<Angle class1="12" class2="11" class3="12" class4="12" k="0.30843384" />
<Angle class1="21" class2="23" class3="0" class4="0" k="0.15498163" />
<Angle class1="24" class2="23" class3="0" class4="0" k="0.15128552" />
<Angle class1="31" class2="33" class3="0" class4="0" k="0.15498163" />
<Angle class1="34" class2="33" class3="0" class4="0" k="0.15128552" />
</AmoebaOutOfPlaneBendForce>

<!-- Torsion rotation parameters, units: kJ/mol/deg | conversion factor: 2.092 -->
<AmoebaTorsionForce torsionUnit="0.5">
<Torsion class1="22" class2="21" class3="23" class4="24" amp1="-0.3222" angle1="0.00000000" amp2="0.0920" angle2="3.14159265" amp3="-0.1799" angle3="0.00000000" />
<Torsion class1="28" class2="27" class3="25" class4="26" amp1="0.0000" angle1="0.00000000" amp2="0.0000" angle2="3.14159265" amp3="0.6255" angle3="0.00000000" />
<Torsion class1="32" class2="31" class3="29" class4="30" amp1="0.0000" angle1="0.00000000" amp2="0.0000" angle2="3.14159265" amp3="0.6255" angle3="0.00000000" />
<Torsion class1="30" class2="29" class3="31" class4="33" amp1="0.0000" angle1="0.00000000" amp2="0.0000" angle2="3.14159265" amp3="2.7196" angle3="0.00000000" />
<Torsion class1="29" class2="31" class3="33" class4="34" amp1="0.0000" angle1="0.00000000" amp2="1.6736" angle2="3.14159265" amp3="0.0000" angle3="0.00000000" />
<Torsion class1="32" class2="31" class3="33" class4="34" amp1="-0.3222" angle1="0.00000000" amp2="0.0920" angle2="3.14159265" amp3="-0.1799" angle3="0.00000000" />
</AmoebaTorsionForce>

<!-- Bond stretching-angle bending cross terms, units: kJ/mol/nm/deg | conversion factor: 0.730246 -->
<AmoebaStretchBendForce stretchBendUnit="1.0">
<StretchBend class1="12" class2="11" class3="12" k1="8.3978290" k2="8.3978290" />
<StretchBend class1="22" class2="21" class3="23" k1="8.3978290" k2="8.3978290" />
<StretchBend class1="21" class2="23" class3="24" k1="13.6556002" k2="13.6556002" />
<StretchBend class1="24" class2="23" class3="24" k1="13.6556002" k2="13.6556002" />
<StretchBend class1="27" class2="25" class3="26" k1="3.1400578" k2="3.1400578" />
<StretchBend class1="25" class2="27" class3="28" k1="8.3978290" k2="8.3978290" />
<StretchBend class1="31" class2="29" class3="30" k1="3.1400578" k2="3.1400578" />
<StretchBend class1="29" class2="31" class3="32" k1="8.3978290" k2="8.3978290" />
<StretchBend class1="32" class2="31" class3="33" k1="8.3978290" k2="8.3978290" />
<StretchBend class1="31" class2="33" class3="34" k1="13.6556002" k2="13.6556002" />
<StretchBend class1="34" class2="33" class3="34" k1="13.6556002" k2="13.6556002" />
</AmoebaStretchBendForce>

<!-- van der Waals parameters, units: kJ/mol and nm (from kcal/mol and Å) -->
<AmoebaVdwForce type="BUFFFERED-14-7" radiusrule="CUBIC-MEAN" radiustype="R-MIN" radiussize="DIAMETER" epsilonRule="HHG" vdw-13-scale="0.0" vdw-14-scale="1.0" vdw-15-scale="1.0" >
<Vdw class="1" sigma="0.34050" epsilon="0.460240" reduction="1.00" />
<Vdw class="2" sigma="0.26550" epsilon="0.056484" reduction="0.91" />
<Vdw class="3" sigma="0.35500" epsilon="1.464400" reduction="1.00" />
<Vdw class="11" sigma="0.36500" epsilon="0.443504" reduction="1.00" />
<Vdw class="12" sigma="0.39590" epsilon="0.439320" reduction="1.00" />
<Vdw class="21" sigma="0.38200" epsilon="0.422584" reduction="1.00" />
<Vdw class="22" sigma="0.29800" epsilon="0.100416" reduction="0.92" />
<Vdw class="23" sigma="0.38200" epsilon="0.443504" reduction="1.00" />
<Vdw class="24" sigma="0.35000" epsilon="0.397480" reduction="1.00" />
<Vdw class="25" sigma="0.35600" epsilon="0.439320" reduction="1.00" />
<Vdw class="26" sigma="0.24000" epsilon="0.083680" reduction="0.91" />
<Vdw class="27" sigma="0.38200" epsilon="0.422584" reduction="1.00" />
<Vdw class="28" sigma="0.29800" epsilon="0.100416" reduction="0.92" />
<Vdw class="29" sigma="0.35600" epsilon="0.439320" reduction="1.00" />
<Vdw class="30" sigma="0.24000" epsilon="0.083680" reduction="0.91" />
<Vdw class="31" sigma="0.38200" epsilon="0.422584" reduction="1.00" />
<Vdw class="32" sigma="0.29800" epsilon="0.100416" reduction="0.92" />
<Vdw class="33" sigma="0.38200" epsilon="0.443504" reduction="1.00" />
<Vdw class="34" sigma="0.35000" epsilon="0.397480" reduction="1.00" />
</AmoebaVdwForce>

<AmoebaMultipoleForce direct1Scale="0.0" direct2Scale="1.0" direct3Scale="1.0" direct4Scale="1.0"
mpole12Scale="0.0" mpole13Scale="0.0" mpole14Scale="0.4" mpole15Scale="0.8"
mutual11Scale="1.0" mutual12Scale="1.0" mutual13Scale="1.0" mutual14Scale="1.0"
mutual15Scale="1.0" polar12Scale="0.0" polar13Scale="0.0" polar14Intra="0.5" polar14Scale="1.0" polar15Scale="1.0" >
<Multipole type="1" kz="-2" kx="-2"
c0="0.519660000"
d1="0.000000000" d2="0.000000000" d3="0.007556121"
q11="0.000354031"
q21="0.000000000" q22="-0.000390257"
q31="0.000000000" q32="0.000000000" q33="0.000036226" />
<Multipole type="2" kz="1" kx="2"
c0="0.259830000"
d1="-0.002042095" d2="0.000000000" d3="-0.003078753"
q11="-0.000034285"
q21="0.000000000" q22="-0.000100241"
q31="-0.000001895" q32="0.000000000" q33="0.000134526" />
<Multipole type="3" kz="0" kx="0"
c0="2.000000000"
d1="0.000000000" d2="0.000000000" d3="0.000000000"

```

```

q11=" 0.000000000"
q21=" 0.000000000" q22=" 0.000000000"
q31=" 0.000000000" q32=" 0.000000000" q33=" 0.000000000" />
<Multipole type="11" kz="12" kx="12"
c0 = 1.319110000"
d1 = 0.000000000" d2 = 0.000000000" d3 = 0.000000000"
q11=" 0.000021684"
q21=" 0.000000000" q22="-0.000043367"
q31=" 0.000000000" q32=" 0.000000000" q33=" 0.000021684" />
<Multipole type="12" kz="11" kx="12"
c0 = -1.106370000"
d1 = 0.000000000" d2 = 0.000000000" d3 = 0.007373026"
q11=" -0.000445040"
q21=" 0.000000000" q22="-0.000263180"
q31=" 0.000000000" q32=" 0.000000000" q33=" 0.000708220" />
<Multipole type="21" kz="23" kx="22"
c0 = -0.282770000"
d1 = 0.000000000" d2 = 0.000000000" d3 = 0.001633041"
q11=" -0.000075944"
q21=" 0.000000000" q22="-0.000075944"
q31=" 0.000000000" q32=" 0.000000000" q33=" 0.000151887" />
<Multipole type="22" kz="21" kx="23"
c0 = 0.012720000"
d1 = 0.000472026" d2 = 0.000000000" d3 = -0.001098043"
q11=" -0.000098690"
q21=" 0.000000000" q22="-0.000002418"
q31=" -0.000059478" q32=" 0.000000000" q33=" 0.000102108" />
<Multipole type="23" kz="24" kx="24"
c0 = 0.998270000"
d1 = 0.000000000" d2 = 0.000000000" d3 = 0.000954107"
q11=" -0.000047166"
q21=" 0.000000000" q22="-0.000317506"
q31=" 0.000000000" q32=" 0.000000000" q33=" 0.000364672" />
<Multipole type="24" kz="23" kx="24"
c0 = -0.876830000"
d1 = 0.000000000" d2 = 0.000000000" d3 = -0.000256122"
q11=" -0.000359230"
q21=" 0.000000000" q22=" 0.000011304"
q31=" 0.000000000" q32=" 0.000000000" q33=" 0.000347926" />
<Multipole type="25" kz="27" kx="26"
c0 = 0.128090000"
d1 = 0.000000000" d2 = 0.000000000" d3 = 0.004189496"
q11=" -0.000169399"
q21=" 0.000000000" q22="-0.000169399"
q31=" 0.000000000" q32=" 0.000000000" q33=" 0.000338797" />
<Multipole type="26" kz="25" kx="27"
c0 = 0.193700000"
d1 = 0.001694425" d2 = 0.000000000" d3 = -0.008149329"
q11=" -0.000002558"
q21=" 0.000000000" q22="-0.000004350"
q31=" 0.000033557" q32=" 0.000000000" q33=" 0.000006907" />
<Multipole type="27" kz="25" kx="28"
c0 = -0.028890000"
d1 = 0.000000000" d2 = 0.000000000" d3 = 0.015752018"
q11=" -0.000479091"
q21=" 0.000000000" q22="-0.000479091"
q31=" 0.000000000" q32=" 0.000000000" q33=" 0.000958183" />
<Multipole type="28" kz="27" kx="25"
c0 = 0.106570000"
d1 = -0.001580123" d2 = 0.000000000" d3 = -0.004209605"
q11=" -0.000061952"
q21=" 0.000000000" q22="-0.000002539"
q31=" -0.000004966" q32=" 0.000000000" q33=" 0.000064491" />
<Multipole type="29" kz="31" kx="30"
c0 = 0.036920000"
d1 = 0.000004233" d2 = 0.000000000" d3 = 0.010576136"
q11=" -0.000187507"
q21=" 0.000000000" q22="-0.000187432"
q31=" 0.000000271" q32=" 0.000000000" q33=" 0.000374940" />
<Multipole type="30" kz="29" kx="31"
c0 = 0.225570000"
d1 = 0.000216963" d2 = 0.000000000" d3 = -0.009796128"
q11=" 0.000002660"
q21=" 0.000000000" q22=" 0.000003444"
q31=" -0.000011920" q32=" 0.000000000" q33=" -0.000006105" />
<Multipole type="31" kz="29" kx="33"
c0 = -0.211990000"
d1 = 0.015472612" d2 = 0.000000000" d3 = 0.018750336"
q11=" -0.000700277"
q21=" 0.000000000" q22="-0.000703413"
q31=" 0.000153764" q32=" 0.000000000" q33=" 0.001403690" />
<Multipole type="32" kz="31" kx="29"
c0 = 0.186920000"
d1 = -0.001104393" d2 = 0.000000000" d3 = -0.009094440"
q11=" 0.000013301"
q21=" 0.000000000" q22=" 0.000045290"
q31=" 0.000007010" q32=" 0.000000000" q33=" -0.000058591" />
<Multipole type="33" kz="34" kx="34"
c0 = 1.016660000"
d1 = -0.003366625" d2 = 0.000000000" d3 = 0.011001594"
q11=" 0.000343315"
q21=" 0.000000000" q22="-0.000059833"
q31=" 0.000096171" q32=" 0.000000000" q33=" -0.000283482" />
<Multipole type="34" kz="33" kx="34"
c0 = -0.946070000"
d1 = 0.005137782" d2 = 0.000000000" d3 = -0.000298456"
q11=" -0.000419212"
q21=" 0.000000000" q22="-0.000063464"
q31=" 0.000036040" q32=" 0.000000000" q33=" 0.000482676" />
<Polarize type="1" polarizability="0.000837" thole="0.39" pgrp1="2" />
<Polarize type="2" polarizability="0.000496" thole="0.39" pgrp1="1" />
<Polarize type="3" polarizability="0.000550" thole="0.16" />
<Polarize type="11" polarizability="0.001334" thole="0.39" pgrp1="12" />
<Polarize type="12" polarizability="0.000837" thole="0.39" pgrp1="11" />
<Polarize type="21" polarizability="0.001334" thole="0.39" />
<Polarize type="22" polarizability="0.000496" thole="0.39" />
<Polarize type="23" polarizability="0.001334" thole="0.39" />
<Polarize type="24" polarizability="0.000921" thole="0.39" />
<Polarize type="25" polarizability="0.001073" thole="0.39" />
<Polarize type="26" polarizability="0.000496" thole="0.39" />

```

```

<Polarize type="27" polarizability="0.001334" thole="0.39" />
<Polarize type="28" polarizability="0.000496" thole="0.39" />
<Polarize type="29" polarizability="0.001073" thole="0.39" />
<Polarize type="30" polarizability="0.000496" thole="0.39" />
<Polarize type="31" polarizability="0.001334" thole="0.39" />
<Polarize type="32" polarizability="0.000496" thole="0.39" />
<Polarize type="33" polarizability="0.001334" thole="0.39" />
<Polarize type="34" polarizability="0.000837" thole="0.39" />
</AmoebaMultipoleForce>

<!-- Urey-Bradley term for water, units kj/mol/nm^2 | conversion factor: 418.4 -->
-->
<AmoebaUreyBradleyForce cubic="0.0" quartic="0.0" >
<UreyBradley class1="2" class2="1" class3="2" k="-3179.84" d="0.15326" />
</AmoebaUreyBradleyForce>

</ForceField>

```

### S3. FORCE FIELD PARAMETERS FOR RIGID-ION MODEL

```

#####
# Library file for minerals simulations with LAMMPS
# It includes potentials for
# water (SPC/Fw)
# Alkaline and alkaline-earth metals
# carbonate
# acetate, methylammonium, glycine
#####
#### Atoms' types - mass - charge
#####
# 48 atom types

# Monovalent ions
variable Na equal 1 # sodium
variable K equal 2 # potassium
variable Rb equal 3 # rubidium
variable Cs equal 4 # cesium
variable Cl equal 5 # chloride

# Divalent ions
variable Mg equal 6 # magnesium
variable Ca equal 7 # calcium
variable Sr equal 8 # strontium
variable Ba equal 9 # barium

# Water - SPC/Fw
variable O2 equal 12 # water
variable H2 equal 13 #

# Carbonate
variable C4 equal 16 # carbonate
variable O4 equal 17 #

# Acetate
variable C14 equal 35 #
variable H14 equal 36 #
variable C15 equal 37 #
variable O15 equal 38 #

# Methylammonium
variable C16 equal 39 #
variable H4 equal 40 #
variable H16 equal 41 #
variable N4 equal 42 #

# Glycine (ZT)
variable C17 equal 43 #
variable C18 equal 44 #
variable H5 equal 45 #
variable H17 equal 46 #
variable N5 equal 47 #
variable O18 equal 48 #

#####
#### Atomic masses
#####

mass ${Na} 22.990
mass ${K} 39.100
mass ${Rb} 85.470
mass ${Cs} 132.900
mass ${Cl} 35.450
mass ${Mg} 24.310
mass ${Ca} 40.080
mass ${Sr} 87.620
mass ${Ba} 137.330
mass ${O2} 16.000
mass ${H2} 1.010
mass ${C4} 12.010
mass ${O4} 16.000

# Acetate
mass ${C14} 12.010
mass ${H14} 1.0100
mass ${C15} 12.010
mass ${O15} 16.000

# Methylammonium
mass ${H4} 1.008
mass ${N4} 14.010
mass ${C16} 12.010
mass ${H16} 1.008

# Glycine (ZT)

```

```

mass ${H5} 1.008
mass ${O18} 16.000
mass ${C18} 12.011
mass ${H17} 1.008
mass ${C17} 12.011
mass ${N5} 14.0067

#####
#### Atomic charges
#####

set type ${Na} charge 1.000000
set type ${K} charge 1.000000
set type ${Rb} charge 1.000000
set type ${Cs} charge 1.000000
set type ${Cl} charge -1.000000
set type ${Mg} charge 2.000000
set type ${Ca} charge 2.000000
set type ${Sr} charge 2.000000
set type ${Ba} charge 2.000000

# Water SPC/Fw
set type ${O2} charge -0.820000
set type ${H2} charge 0.410000

# Carbonate
set type ${C4} charge 1.123285
set type ${O4} charge -1.041095

# Acetate
set type ${C14} charge -0.348000
set type ${H14} charge 0.064000
set type ${C15} charge 0.764000
set type ${O15} charge -0.804000

# Methylammonium
set type ${C16} charge -0.079000
set type ${H4} charge 0.311000
set type ${H16} charge 0.111000
set type ${N4} charge -0.187000

# Glycine (ZT)
set type ${H5} charge 0.307000
set type ${O18} charge -0.733000
set type ${C18} charge 0.611000
set type ${H17} charge 0.082000
set type ${C17} charge -0.043000
set type ${N5} charge -0.187000

#####
#### Covalent bond parameters
#####
#@ 13 bond types

bond_style hybrid harmonic morse
#@ O2 - H2
bond_coeff 1 harmonic 22.965000 1.0120000
#@ C4 - O4
bond_coeff 2 harmonic 20.424650 1.3042000

# Acetate
#@ H14 - C14
bond_coeff 3 harmonic 15.618400 1.0963000
#@ C15 - O15
bond_coeff 4 harmonic 24.765100 1.2516000
#@ C14 - C15
bond_coeff 5 harmonic 11.482000 1.5768500

# Methylammonium
#@ C16 - H16
bond_coeff 6 harmonic 16.905200 1.0876000
#@ N4 - C16
bond_coeff 7 harmonic 13.162300 1.4958000
#@ N4 - H4
bond_coeff 8 harmonic 20.528750 1.0250000

# Glycine (ZT)
#@ C17 - H17
bond_coeff 9 harmonic 15.618400 1.0963000
#@ O18 - C18
bond_coeff 10 harmonic 24.765100 1.2516000
#@ C17 - N5
bond_coeff 11 harmonic 13.162300 1.4658000
#@ N5 - H5
bond_coeff 12 harmonic 20.528750 1.0250000
#@ C18 - C17
bond_coeff 13 harmonic 11.482000 1.5100000

#####
#### Covalent angle-bending parameters
#####
#@ 18 angle types

angle_style hybrid class2 harmonic
#@ H2 - O2 - H2
angle_coeff 1 harmonic 1.6456800 113.24000
#@ O4 - C4 - O4
angle_coeff 2 class2 120.00000 6.6170000 0.0000000 0.0000000
angle_coeff 2 class2 bb 12.81800 1.3042000 1.3042000
angle_coeff 2 class2 ba 1.53319 1.5331900 1.3042000 1.3042000

# Acetate
#@ H14 - C14 - H14
angle_coeff 3 harmonic 1.5441000 108.57000
#@ C14 - C15 - O15
angle_coeff 4 harmonic 2.8160500 115.04000
#@ O15 - C15 - O15
angle_coeff 5 harmonic 5.0780000 129.92000
#@ H14 - C14 - C15
angle_coeff 6 harmonic 1.9992000 110.33000

```

```

# Methylammonium
#@ H4 - N4 - C16
angle_coeff 7 harmonic 3.1083500 106.11000
#@ H4 - N4 - H4
angle_coeff 8 harmonic 1.6219500 105.67000
#@ N4 - C16 - H16
angle_coeff 9 harmonic 1.5303500 111.73000
#@ H16 - C16 - H16
angle_coeff 10 harmonic 1.7250000 116.28000

# Glycine (ZT)
#@ C18 - C17 - N5
angle_coeff 11 harmonic 1.5441000 114.70000
#@ C17 - N5 - H5
angle_coeff 12 harmonic 3.1083500 106.11000
#@ O18 - C18 - C17
angle_coeff 13 harmonic 2.8160500 115.04000
#@ O18 - C18 - O18
angle_coeff 14 harmonic 5.0780000 129.92000
#@ H5 - N5 - H5
angle_coeff 15 harmonic 1.6219500 105.67000
#@ H17 - C17 - N5
angle_coeff 16 harmonic 1.5303500 111.73000
#@ C18 - C17 - H17
angle_coeff 17 harmonic 1.9992000 109.26000
#@ H17 - C17 - H17
angle_coeff 18 harmonic 1.5441000 108.70000

#####
#### Covalent dihedral parameters
#####
#@ 7 dihedral types

dihedral_style charmm
#@ H14 - C14 - C15 - O15
dihedral_coeff 1 0.00005403 6 180 0.00000
#@ H4 - N4 - C16 - H16
dihedral_coeff 2 0.00703640 3 360 0.00000
#@ C18 - C17 - N5 - H5
dihedral_coeff 3 0.00703640 3 360 0.00000
#@ O18 - C18 - C17 - N5
dihedral_coeff 4 0.00005403 6 180 0.00000
#@ H17 - C17 - C18 - O18
dihedral_coeff 5 0.00005403 6 180 0.00000
#@ H5 - N5 - C17 - C18
dihedral_coeff 6 0.00703640 3 360 0.00000
#@ H5 - N5 - C17 - H17
dihedral_coeff 7 0.00703640 3 360 0.00000

#####
#### Covalent improper dihedral parameters
#####
#@ 3 improper types

improper_style distance
#@ C4 - D4 - O4 - O4
improper_coeff 1 13.647000 360.00000

# Acetate
#@ C15 - C14 - O15 - O15
improper_coeff 2 8.3587000 360.00000

# Glycine (ZT)
#@ C18 - C17 - O18 - O18
improper_coeff 3 8.35870000 360.0000

#####
# Pair potentials
#####

variable rmin equal 6.
variable rmax equal 9.
variable rcul equal 9.

pair_style hybrid/overlay coul/long ${rcoul} &
lj/cut ${rmax} &
lj/cut/soft 1.0 0.5 10. &
lj/mdf ${rmin} ${rmax} &
lennard/mdf ${rmin} ${rmax} &
buck/mdf ${rmin} ${rmax}

pair_coeff * * coul/long

#####
# Interactions with water
# Water - SPC/Fw
pair_coeff ${O2} ${O2} lj/cut 0.00674 3.165492
pair_modify tail yes

# Alkaline metals
pair_coeff ${Na} ${O2} lj/mdf 0.00012 3.738298
pair_coeff ${K} ${O2} lj/mdf 0.015 3.15
pair_coeff ${Rb} ${O2} lj/mdf 0.015 3.27
pair_coeff ${Cl} ${O2} lj/mdf 0.022636 3.51

# Alkaline earths
pair_coeff ${Mg} ${O2} lj/mdf 0.001137 2.82
pair_coeff ${Ca} ${O2} lj/mdf 0.00095 3.35
pair_coeff ${Sr} ${O2} lj/mdf 0.000776 3.65
pair_coeff ${Ba} ${O2} lj/mdf 0.000657 3.965

# Carbonate
pair_coeff ${O2} ${O4} buck/mdf 12534.455133 0.202 0.
pair_coeff ${H2} ${O4} buck/mdf 340. 0.217 0.

# Acetate
pair_coeff ${C14} ${C14} lj/mdf 0.0042100000 3.3611000000 6.0000 9.0000
pair_coeff ${C14} ${H14} lj/mdf 0.0022700000 2.8244000000 6.0000 9.0000
pair_coeff ${H14} ${H14} lj/mdf 0.0012300000 2.3734100000 6.0000 9.0000
pair_coeff ${H14} ${C15} lj/mdf 0.0022700000 2.8244000000 6.0000 9.0000
pair_coeff ${C15} ${C15} lj/mdf 0.0042100000 3.3611000000 6.0000 9.0000
    
```

```

pair_coeff $(C14) $(O15) lj/mdf 0.0086700000 2.9708200000 6.0000 9.0000
pair_coeff $(H14) $(O15) lj/mdf 0.0046800000 2.4964400000 6.0000 9.0000
pair_coeff $(C15) $(O15) lj/mdf 0.0086700000 2.9708200000 6.0000 9.0000
pair_coeff $(O2) $(C14) lj/mdf 0.0178800000 2.6258500000 6.0000 9.0000

# acetate - water
pair_coeff $(O2) $(O15) lj/cut 0.0017955 3.27232
pair_coeff $(O2) $(O15) buck/mdf 1105. 0.305 0.000
pair_coeff $(O2) $(C14) lj/cut 0.00440 3.36693
pair_coeff $(O2) $(C15) lj/cut 0.00440 3.36693
pair_coeff $(O2) $(H14) lj/cut 0.00288 2.74099

# calcium - acetate
pair_coeff $(Ca) $(O15) buck/mdf 2388.4841 0.271511 0.
pair_coeff $(Ca) $(C14) lennard/mdf 12000.0000 0.0

# carbonate - acetate
pair_coeff $(O4) $(H14) lennard/mdf 34. 0.0
pair_coeff $(O4) $(C15) buck/mdf 67.475158 0.570000 0.

# Methylammonium
# lj/cut should have rmax=10
pair_coeff $(O2) $(C16) lj/cut/soft 0.00440 3.36701 1.0
pair_coeff $(O2) $(H4) lj/cut/soft 0.00000 1.00 1.0
pair_coeff $(O2) $(H16) lj/cut/soft 0.00288 2.74105 1.0
pair_coeff $(O2) $(N4) lj/cut/soft 0.00332 3.47115 1.0
pair_coeff $(C16) $(C16) lj/mdf 0.00288 3.58118
pair_coeff $(C16) $(H4) lj/mdf 0.00000 1.00
pair_coeff $(C16) $(H16) lj/mdf 0.00188 2.91541
pair_coeff $(C16) $(N4) lj/mdf 0.00437 3.35146
pair_coeff $(H4) $(H4) lj/mdf 0.00000 1.00
pair_coeff $(H4) $(H16) lj/mdf 0.00000 1.00
pair_coeff $(H4) $(N4) lj/mdf 0.00000 1.00
pair_coeff $(H16) $(H16) lj/mdf 0.00123 2.37341
pair_coeff $(H16) $(N4) lj/mdf 0.00285 2.72839
pair_coeff $(N4) $(N4) lj/mdf 0.00663 3.13647

# calcium - methylammonium
pair_coeff $(Ca) $(C16) lennard/mdf 2724.137931 0.0

# carbonate - methylammonium
pair_coeff $(O4) $(H4) buck/mdf 728.912480 0.250000 0.
pair_coeff $(O4) $(H16) lennard/mdf 2750. 0.0

# bicarbonate - methylammonium
pair_coeff $(O6) $(H4) buck/mdf 578.218500 0.250000 0.
pair_coeff $(O6) $(H16) lennard/mdf 2181.470231 0.0
pair_coeff $(O6) $(H4) buck/mdf 420.905395 0.250000 0.
pair_coeff $(O6) $(H16) lennard/mdf 1587.968197 0.0

# Glycine (ZT)
pair_coeff $(O2) $(C17) lj/cut/soft 0.00440 3.36701 1.0
pair_coeff $(O2) $(C18) lj/cut/soft 0.00440 3.36701 1.0
pair_coeff $(O2) $(H5) lj/cut/soft 0.00000 1.00000 1.0
pair_coeff $(O2) $(H17) lj/cut/soft 0.00288 2.74105 1.0
pair_coeff $(O2) $(N5) lj/cut/soft 0.00332 3.47115 1.0
pair_coeff $(O2) $(O18) lj/cut/soft 0.00513 3.27240 1.0
pair_coeff $(C17) $(C17) lj/mdf 0.00288 3.58118
pair_coeff $(C17) $(C18) lj/mdf 0.00288 3.58118
pair_coeff $(C17) $(H5) lj/mdf 0.00000 1.00
pair_coeff $(C17) $(H17) lj/mdf 0.00188 2.91541
pair_coeff $(C17) $(N5) lj/mdf 0.00437 3.35146
pair_coeff $(C17) $(O18) lj/mdf 0.00717 3.06654
pair_coeff $(C18) $(C18) lj/mdf 0.00288 3.58118
pair_coeff $(C18) $(H5) lj/mdf 0.00000 1.00
pair_coeff $(C18) $(H17) lj/mdf 0.00188 2.91541
pair_coeff $(C18) $(N5) lj/mdf 0.00437 3.35146
pair_coeff $(C18) $(O18) lj/mdf 0.00717 3.06654
pair_coeff $(H5) $(H5) lj/mdf 0.00000 1.00
pair_coeff $(H5) $(H17) lj/mdf 0.00000 1.00
pair_coeff $(H5) $(N5) lj/mdf 0.00000 1.00
pair_coeff $(H5) $(O18) lj/mdf 0.00000 1.00
pair_coeff $(H17) $(H17) lj/mdf 0.00123 2.37341
pair_coeff $(H17) $(N5) lj/mdf 0.00285 2.72839
pair_coeff $(H17) $(O18) lj/mdf 0.00468 2.49644
pair_coeff $(N5) $(N5) lj/mdf 0.00663 3.13647
pair_coeff $(N5) $(O18) lj/mdf 0.00152 3.98580
pair_coeff $(O18) $(O18) lj/mdf 0.01788 2.62585

# calcium - glycine (ZT)
pair_coeff $(Ca) $(O18) buck/mdf 2388.4841 0.271511 0.
pair_coeff $(Ca) $(N5) buck/mdf 22878.8 0.215023 0.
pair_coeff $(Ca) $(C17) lennard/mdf 12000.0000 0.0
pair_coeff $(O4) $(H5) buck/mdf 719.5374 0.250000 0.
pair_coeff $(O4) $(H17) lennard/mdf 43.5625 0.0
pair_coeff $(O4) $(C18) buck/mdf 53.9625 0.570000 0.

#####
# Interactions with carbonate
pair_coeff $(Mg) $(O4) buck/mdf 3944.8613 0.238160 0.

pair_coeff $(Ca) $(O4) buck/mdf 3161.6335 0.271511 0.

pair_coeff $(Sr) $(O4) buck/mdf 14250.2690 0.244116 0.

pair_coeff $(Ba) $(O4) buck/mdf 13478.1510 0.258299 0.

pair_coeff $(Na) $(O4) buck/mdf 689.21763 0.315407 0.

pair_coeff $(Rb) $(O4) buck/mdf 2321.4110 0.299028 0.

special_bonds lj 0. 0. 0.5 coul 0. 0. 1.
    
```
